# Supplementary material
Source: MDPI journal article supplement (https://www.mdpi.com/2073-4433/14/4/653)
Supplement: s1 [file s1 › atmosphere-2300806-supplementary.pdf]

## Supplementary materials

**Table S1.** The 44 models used to calculate the total response and the 12 models used to calculate the fast response in Figure S1.

| Models used in the total response |                    |               |               |                 |
|-----------------------------------|--------------------|---------------|---------------|-----------------|
| ACCESS-CM2                        | ACCESS-ESM1-5      | AWI-CM-1-1-MR | BCC-CSM2-MR   | BCC-ESM1        |
| CAMS-CSM1-0                       | CanESM5            | CAS-ESM2-0    | CESM2         | CESM2-FV2       |
| CESM2-WACCM                       | CESM2-WACCM-FV2    | CIESM         | CMCC-CM2-SR5  | CMCC-ESM2       |
| E3SM-1-0                          | EC-Earth3-Aer-Chem | EC-Earth3-CC  | EC-Earth3-Veg | FGOALS-f3-L     |
| FGOALS-g3                         | FIO-ESM-2-0        | GISS-E2-1-G   | GISS-E2-1-H   | GISS-E2-2-G     |
| GISS-E2-2-H                       | ICON-ESM-LR        | IITM-ESM      | INM-CM4-8     | INM-CM5-0       |
| IPSL-CM6A-LR                      | KACE-1-0-G         | KIOST-ESM     | MIROC6        | MPI-ESM-1-2-HAM |
| MPI-ESM1-2-HR                     | MPI-ESM1-2-LR      | MRI-ESM2-0    | NESM3         | NorCPM1         |
| NorESM2-LM                        | NorESM2-MM         | SAM0-UNICON   | TaiESM1       |                 |
| Models used in the fast response  |                    |               |               |                 |
| ACCESS-CM2                        | ACCESS-ESM1-5      | CESM2         | EC-Earth3     | GFDL-ESM4       |
| GISS-E2-1-G                       | IPSL-CM6A-LR       | MIROC6        | MPI-ESM1-2-LR | MRI-ESM2-0      |
| NorESM2-LM                        | NorESM2-MM         |               |               |                 |

**Table S2.** The 9 models used to calculate the convective cloud cover in Figure S2.

| Modle name        | Institution         | Nation             | Resolution<br>(longitude × latitude) |
|-------------------|---------------------|--------------------|--------------------------------------|
| CESM2             | NCAR                | USA                | 1.25° × 0.9375°                      |
| CESM-FV2          | NCAR                | USA                | 2.5° × 1.875°                        |
| CESM-WACCM-FV2    | NCAR                | USA                | 2.5° × 1.875°                        |
| EC-Earth3-AerChem | EC-Earth-Consortium | European Community | ~0.7° × 0.7°                         |
| GISS-E2-1-G       | NASA-GISS           | USA                | 2.5° × 2°                            |
| GISS-E2-1-H       | NASA-GISS           | USA                | 2.5° × 2°                            |
| GISS-E2-2-G       | NASA-GISS           | USA                | 2.5° × 2°                            |
| GISS-E2-2-H       | NASA-GISS           | USA                | 2.5° × 2°                            |

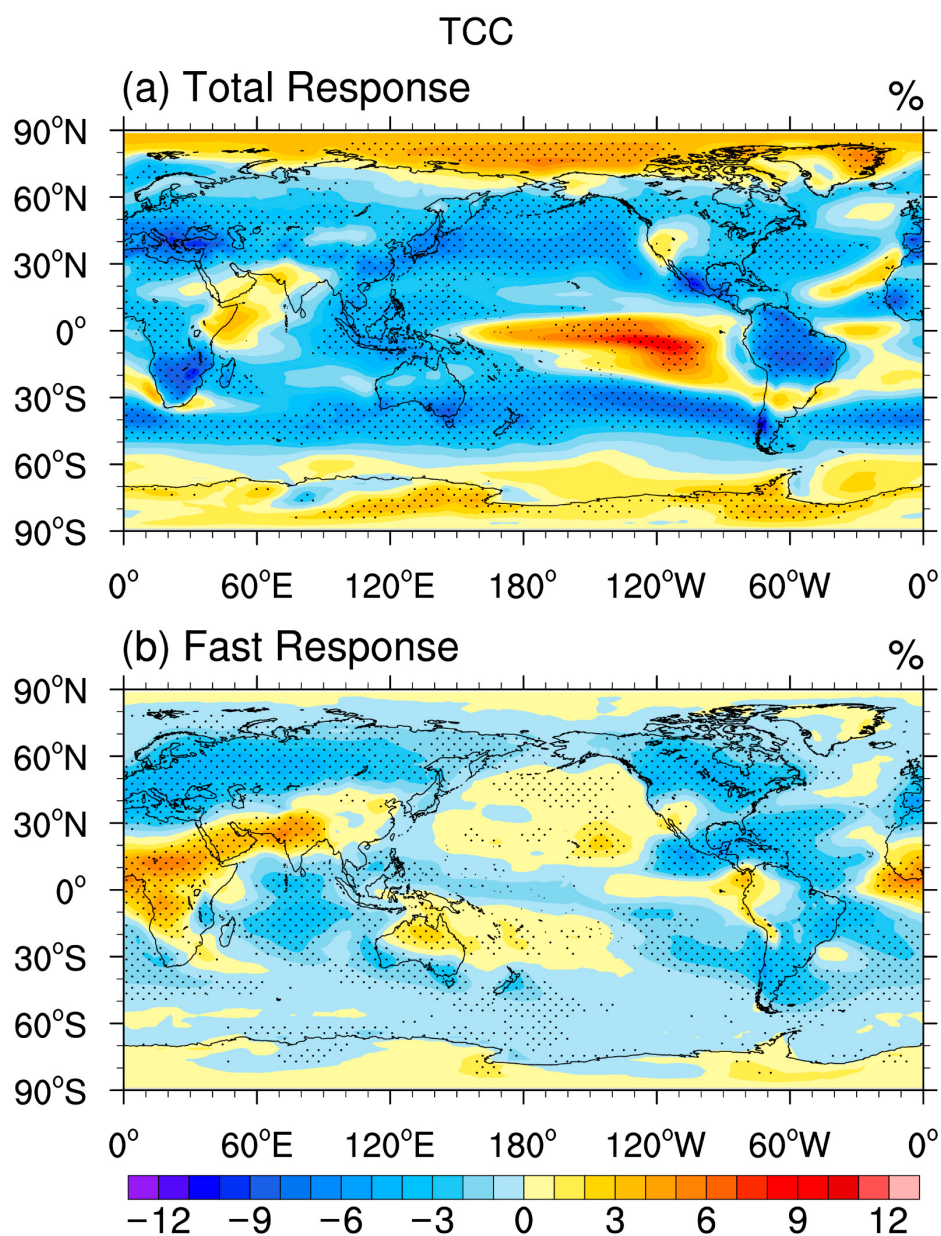

**Figure S1.** (a) The total response of TCC from 44 available models and (b) the fast response from 12 available models (unit: %). Black dot represents more than 80% models agree with the sign of changes.

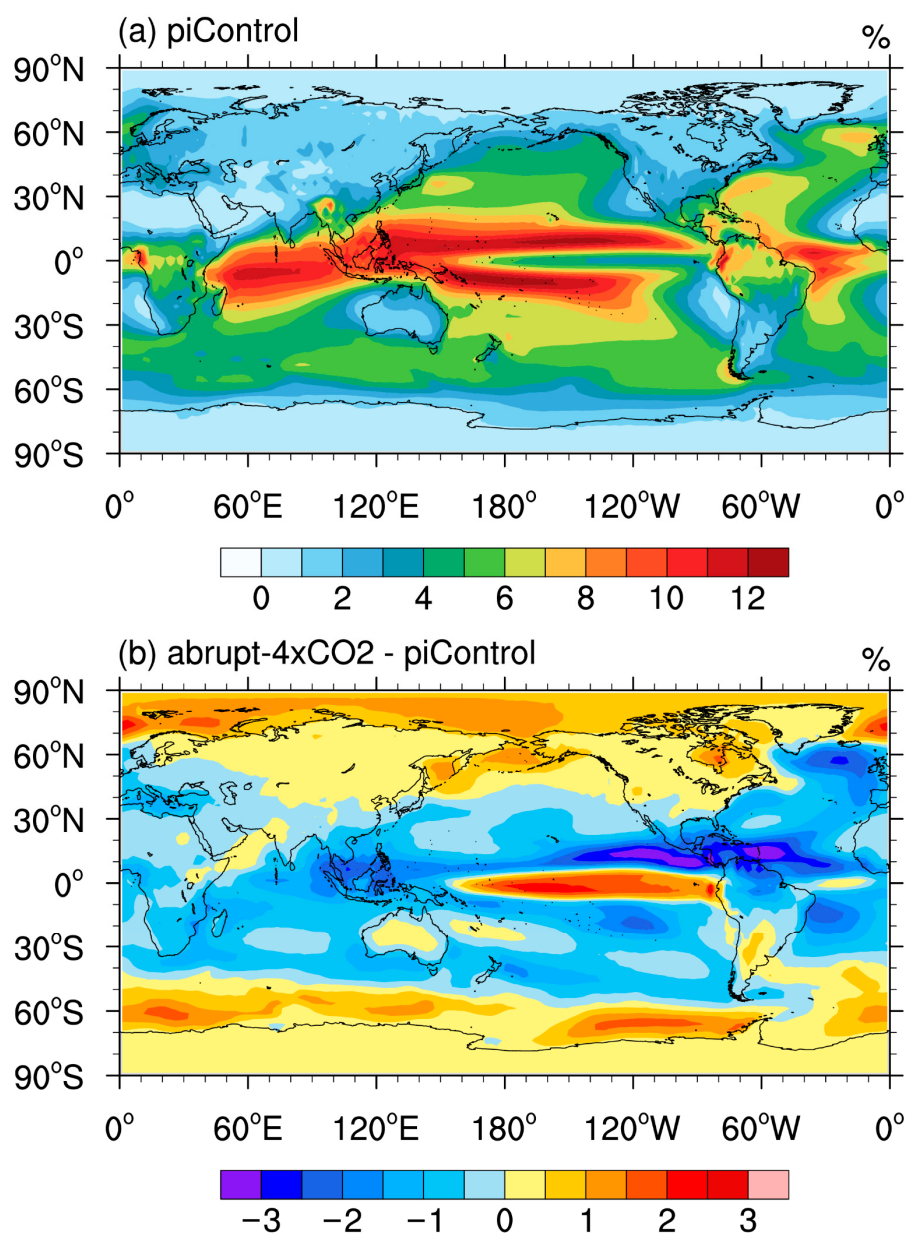

**Figure S2.** (a) The distribution of convective cloud cover provided by 9 available models in piControl, and (b) the difference between abrupt-4xCO<sub>2</sub> and piControl (unit: %).

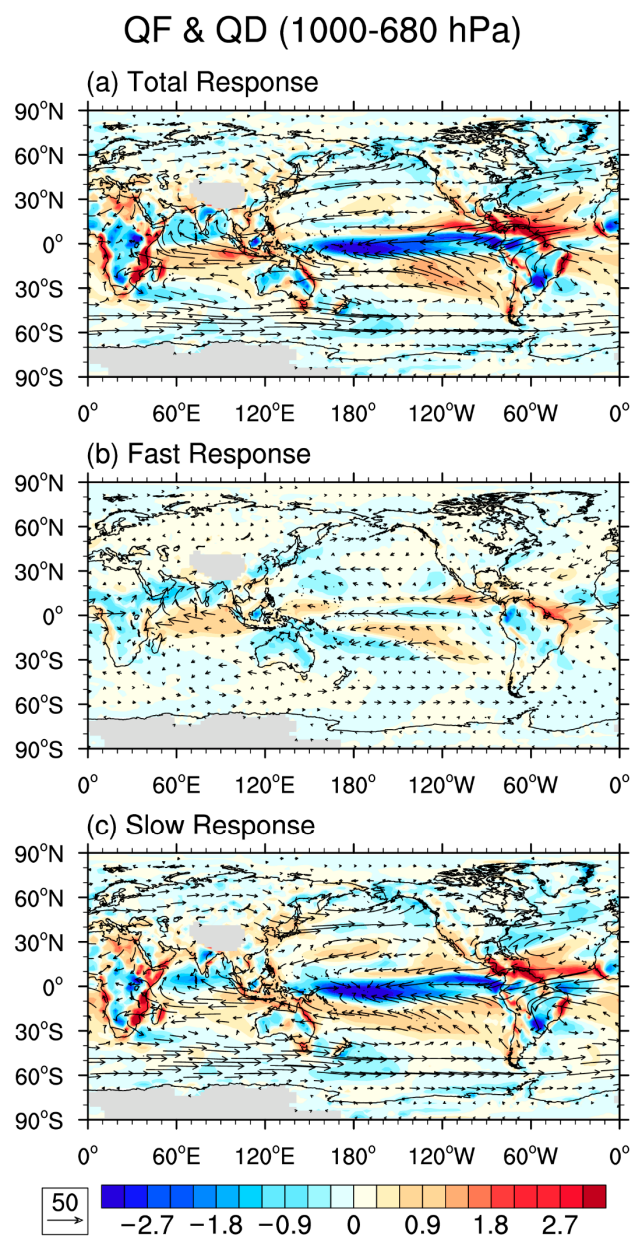

**Figure S3.** (a) Total, (b) fast, and (c) slow responses of global vertical integrated column horizontal water vapor flux (QF, vector, units:  $\text{kg m}^{-1} \text{s}^{-1}$ ) and divergence (QD, color shading, units:  $10^{-5} \text{ kg m}^{-2} \text{s}^{-1}$ , positive values represent water vapor diffusion) from 1000 hPa to 680 hPa.

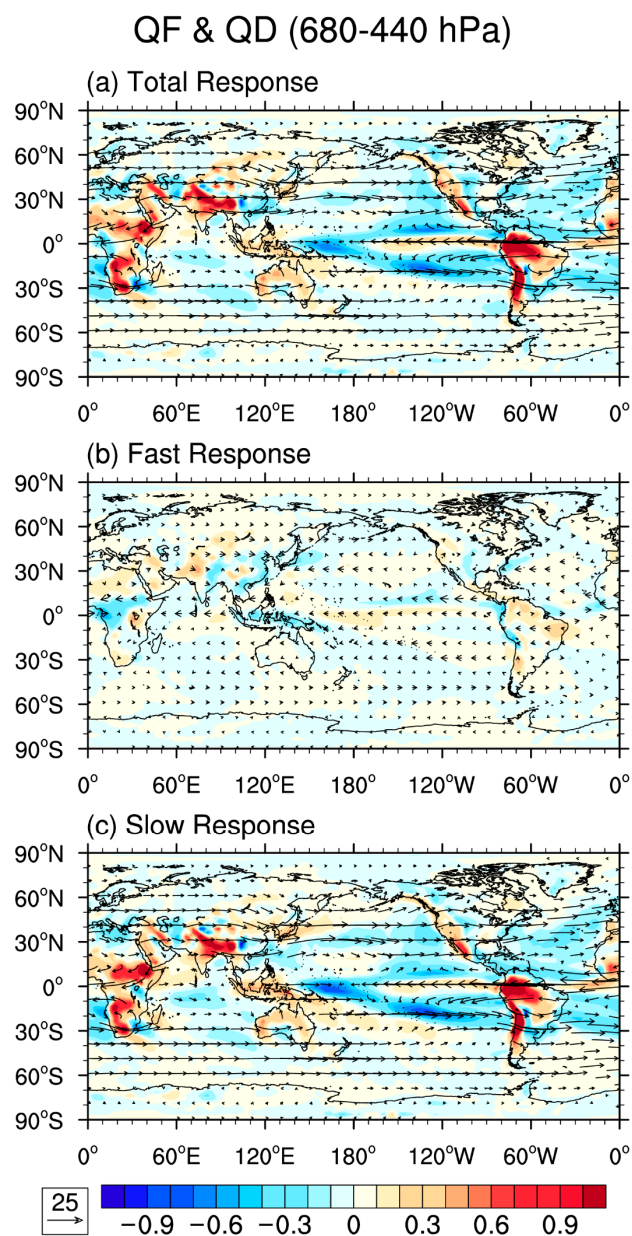

**Figure S4.** Same as Figure S3, but from 680 hPa to 440 hPa.

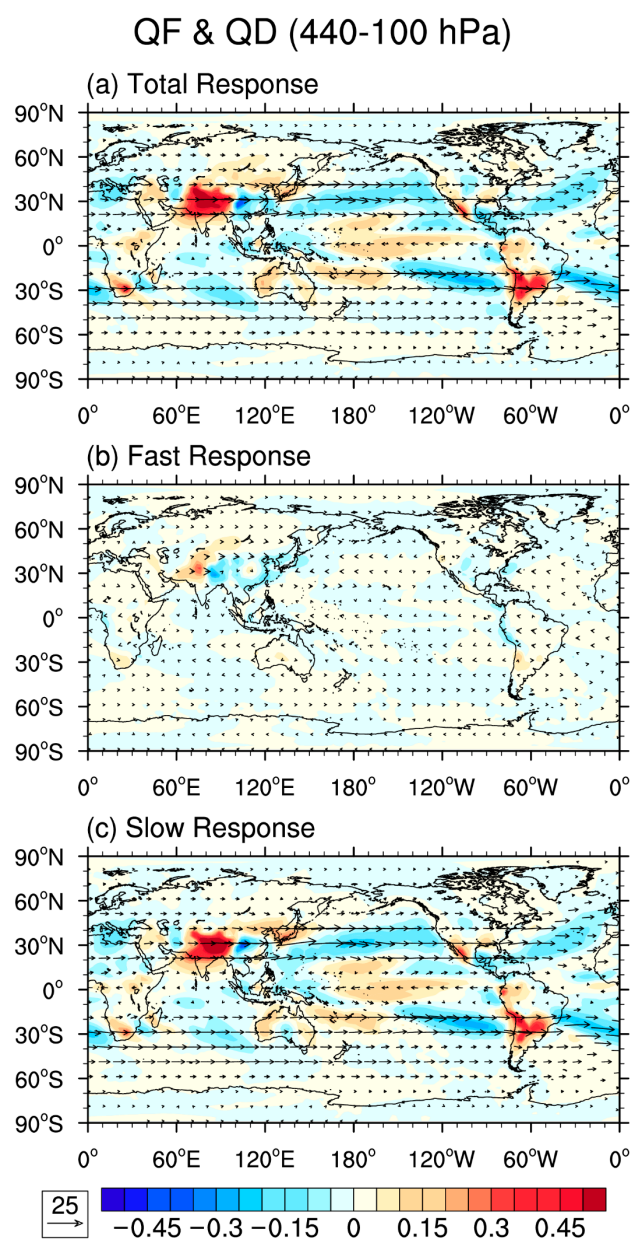

**Figure S5.** Same as Figure S3, but from 440 hPa to 100 hPa.

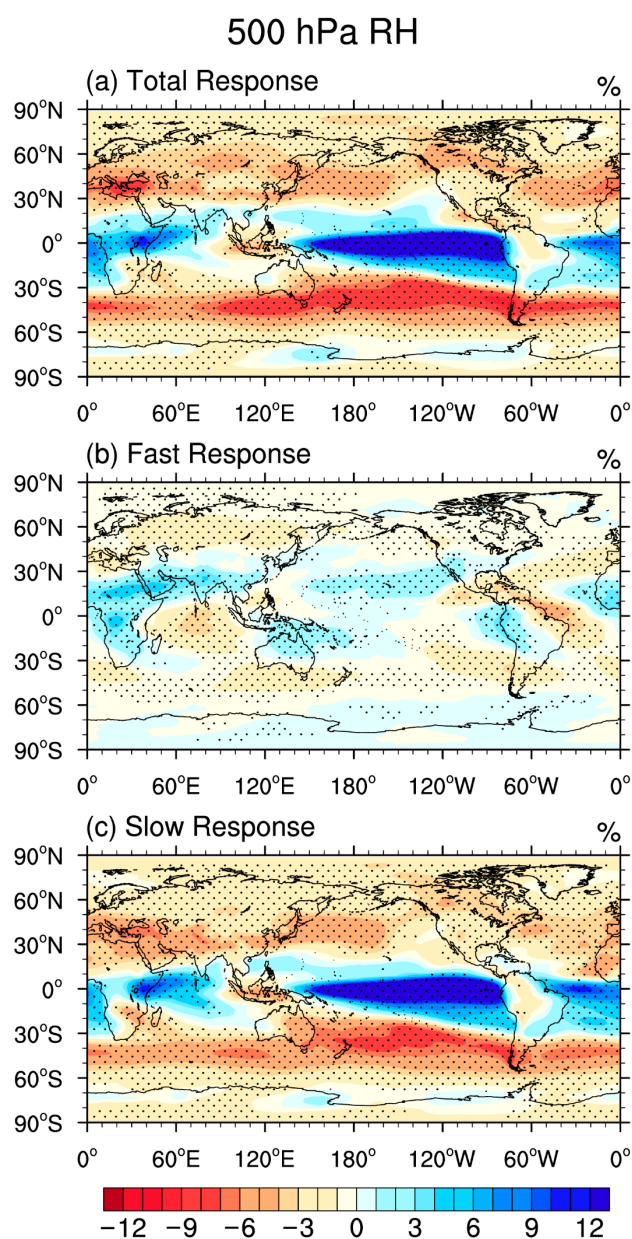

**Figure S6.** (a) Total, (b) fast, and (c) slow responses of 500 hPa relative humidity (units: %). Black dot represents that at least 8 models agree with the sign of changes.
